# Supplementary material
Source: PubMed Central journal article supplement (PMC9516840)
Supplement: NIHMS1836563-supplement-Supplemental_file.pdf [file NIHMS1836563-supplement-Supplemental_file.pdf]

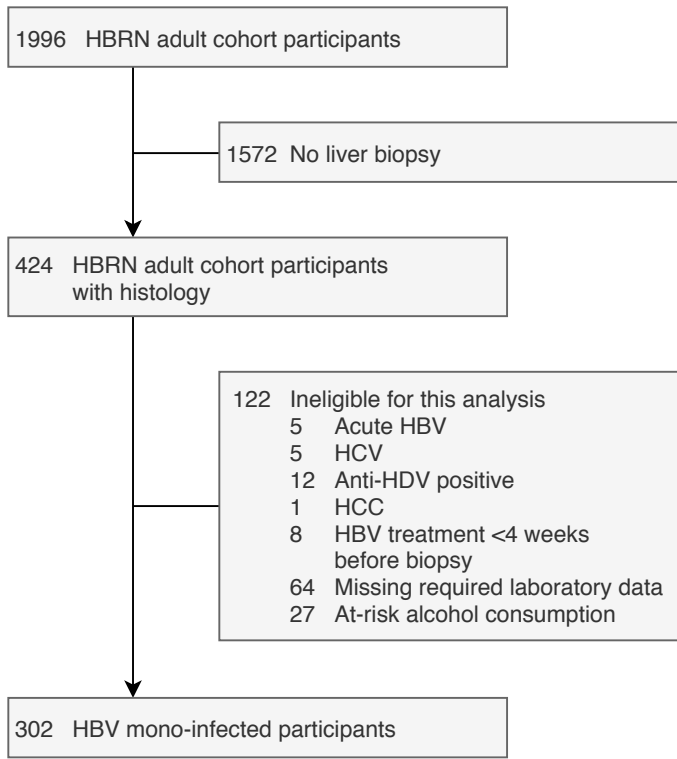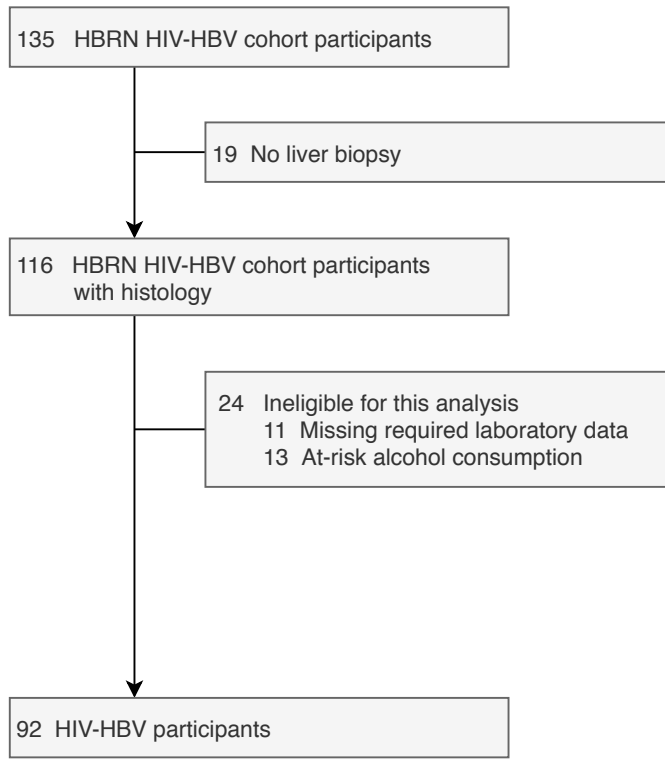

Acronyms: HBV, Hepatitis B virus; HCC, Hepatocellular Carcinoma; HCV, Hepatitis C virus; HDV, Hepatitis D virus; HIV, Human immunodeficiency virus.
